# Supplementary material
Source: Research Square preprint supplement (doi:10.21203/rs.3.rs-9532841/v1)
Supplement: Supplementary file 1 [file 47a5d452e20332a34ec6eb65.docx]

**APPENDIX A: Family demographics questionnaire**

1. How many individuals 18 years of age and older live with you?

None

1

2

3

4

5 or more

2. How many individuals under the age of 18 years live with you?

None

1

2

3

4

5 or more

3. What is the highest level of education completed by you or your child’s other parent/caregiver?

None to 8th grade

  9th to 11th grade

  High school graduate or equivalent

  Some college, 2-year degree, or trade school

  3- or 4-year college/university graduate

  Some graduate school

  Graduate degree

  Do not wish to provide

4. What is your child's primary medical insurance?

Private insurance

Public insurance (government)

Other type of insurance

No insurance

5. What is the primary language you speak at home?

English

  Spanish

  Other

6. Which best describes your race?

Black/African-American

White

Asian

Native Hawaiian or other Pacific Islander

American Indian

Multiracial

Other

7. Which best describes your ethnicity?

Hispanic or Latino

Not Hispanic or Latino

**APPENDIX B: Interview Guide for Caregivers**

*I’ve just begun to record- are you happy to get started? Thank you very much for agreeing to be interviewed.*

*Before we start, some doctors use terms like “heart failure” or “heart dysfunction” when they talk with you about your child’s heart. I wanted to clarify: which of those terms does your medical team use?*

*The aim of this study is to understand the well-being of our patients, their main caregiver, and their family since we know these are all interrelated and important to our patients’ health. We suspect that heart failure can impact the well-being of the child and also their entire family but no one has studied this yet. We plan to use our findings to develop ways to measure and improve the well-being of our patients and families dealing with heart failure.*

*All of the information we collect will be confidential and anonymous (unless there are safety concerns that we identify, in which case we will link you with the appropriate resources).*

*I want you to remember that you are the expert in this. Every parent will have different views and experiences. These differences are important to us and we value your unique perspective.*

*Remember that you don’t have to answer anything you don’t want to, so please feel free to say ‘I don’t want to answer that’ and we’ll move on. If you need a break, just let me know. This should take around an hour. We can also end the conversation any time if you prefer. Do you have any questions? Are you happy to continue?*

| **Topic** | **Subtopic** | **Questions and probes: caregiver** |
| --- | --- | --- |
| Background | -- | We’ll begin with some general questions about you and your family.  Who lives at home with you and your child?  Is there anyone besides you who typically helps care for them?  How old was your child when you were first told they had heart failure?  How does your child’s heart failure diagnosis effect you or them on a day-to-day basis? |
| Perceptions of child quality of life | -- | How would you describe your child’s quality of life right now?  What things do you think bother them most about having heart failure?  Are there things they want to do but don’t because of their heart?  *Probes: For instance, are they limited in what they eat or drink, things like play outside, do sports activities, go for walks; do they have opinions about having to go to the hospital for blood tests, needing to take medicines, being different from friends or not being able to attend school, not feeling well such as being tired all of the time, their appearance?*  What strategies have helped, or could help, your child cope with these things? |
| Social well-being | Relationship with patient | We’ll now move on now to talk about relationships and your experience as their caregiver.  Since their heart failure diagnosis, has your relationship changed? |
|  | Family relationships including siblings | Has your child’s heart failure diagnosis affected other relationships in your home?  *Probe: For instance, reflect on 1) their relationship with brothers or sisters, 2) your domestic partner relationship, 3) your relationship with your other children, 4) your partner’s relationships with your other children* |
|  | Balancing demands | Can you describe how you balance the needs of your child and the other demands in your life? |
|  | Social isolation | Has your child’s illness affected your relationships outside of your household?  *Probe: are you able to spend time doing things that you enjoy and with your social circle?* |
|  | Work | Has your child’s illness affected your job? |
|  | Finances, resources | Has your child’s illness led to any money-related challenges for your family? |
| Physical well- being | Diet, exercise, sleep, specific health diagnoses | Has your child’s illness affected your own physical health? |
| Emotional well- being | Anxiety, fear, depression, stress | Can you tell me about any emotional challenges you’ve faced due to your child’s illness?  *Probe: some parents express a lot of fear, worry, stress because of their caregiver role. Have any of those been a challenge for you?* |
|  | Resilience, coping | Caring for a child with a chronic illness can be challenging but some families also find that there are sometimes positive changes. Have you found any positives in yourself or family?  *Probes: For example, realizing that you are strong and can cope; the family all pulling together. Can you share your perspective on that?* |
| Closing |  | We are nearly finished- only two questions remaining.  Thinking of your child’s heart failure how would you design the health care system right now so that it supported your family better?  What components of your family’s well-being would you immediately improve if you could choose?  Can you think of anything that could be done to help with these components of well-being right now?  Thank-you so much again for talking with me. Do you have any questions or is there anything else you’d like to add? |

**APPENDIX C: Interview Guide for Patients**

*I’ve just begun to record- are you happy to get started? Thank you very much for agreeing to talk with me.*

*We are talking with young people like you, who have problems with their heart, across the country to learn more about how your heart problem affects your day-to-day life at home and in school. We want to learn what matters most to you. This will help your doctors ask you the right questions about your life. We also hope to learn how your family works together.*

*Before we start, some doctors use terms like “heart failure” or “heart dysfunction” when they talk with you about your heart. I wanted to ask: have you heard your doctors say any of these things about your heart?*

*As we talk, keep in mind there are no wrong answers to my questions! You are the expert and I am interested in everything you have to say. Everything will be kept private unless you sound like you are in danger, and in that case we will get help for you. If we share any quotes from these interviews (the things you say) we will never use your name, so no one will know the information came from you.*

*Remember that you don’t have to answer anything you don’t want to, so please feel free to say ‘I don’t want to answer that’ and we’ll move on. If you need a break just let me know. This should take around an hour. We can also end any time if you want to. Do you have any questions? Are you happy to continue?*

| **Topic** | **Subtopic** | **Questions and probes: patient** |
| --- | --- | --- |
| Background | -- | We’ll begin with some general questions about you and your family.  Can you tell me about your heart problem?  How old were you when you were first told your heart wasn’t working well?  At home, who helps you with health-related things, like your medicine or how you’re feeling?  Who lives at home with you? |
| Preferred activities, limitations and abilities | -- | We’ll shift now to talk about everyday life.  What do you like to do for fun?  Are there things you would like to do but don’t because of your heart problem?  What bothers you most about having heart failure?  *Probes: For instance, some people are bothered by not being allowed to eat or drink certain things, not being able to do activities (like play outside, do sports, go for walks), having to go to the hospital for blood tests and clinic, needing to take medicines, being different from friends or not being able to attend school, not feeling well such as being tired all of the time, looking different from others.* |
| Social well-being | Family relationships including siblings  School, peer relationships | We’ll now move on now to talk about relationships.  How are things going in your family? Do you get along well with your mom/dad/brothers/sisters?  Do you think that your heart problem affects your family?  Do you think your heart problem has affected your relationship with your (mom/dad/caregiver)?  How do you do at school?  *Probe: That is, how are you doing with classwork, with teachers, and with classmates?*  Do your friends or people at school know about your heart? |
|  | Friendships | Do you have a best friend? Or a group of friends?  Do you think having heart failure affects your friendships?  *Probes: Do you think that your friends treat you differently because of your heart, or do you treat them differently than you might if you did not have a heart condition?*  What do you wish other people knew about you and your heart problem? |
| Physical well- being  Emotional well- being | Symptoms  Anxiety, depression, stress  Resilience, coping | I’d like to hear how your body and your mind are doing.  Some young people with heart problems don’t feel well. How have you been feeling?  *Probes: Some young people feel very tired, or out of breath, or can’t get around quickly enough- have you felt like this and what bothers you most?*  What about other types of symptoms such as feeling worried, sad, or alone- have you felt like this?  Having a heart problem can help people notice positive things about the way they cope with it and how their family works together. Have you noticed any positives?  *Probes: For example, some people realize that they are strong and can cope, or the family all pulls together. Have you noticed anything like this?* |
| Closing |  | We are nearly finished, only two questions to go.  When you see your doctors, what do you wish they would ask you about?  If you could improve one thing about your life or health right now what would that be?  Thank-you so much again for talking with me. Do you have any questions or is there anything else you’d like to add? |
